# Supplementary material for: iTRAQ-Based Quantitative Proteomics Analysis Reveals the Mechanism of Golden-Yellow Leaf Mutant in Hybrid Paper Mulberry
Source: MDPI journal article supplement (doi:10.3390/ijms23010127), 2021-12-23
Supplement: s1 [file s1]

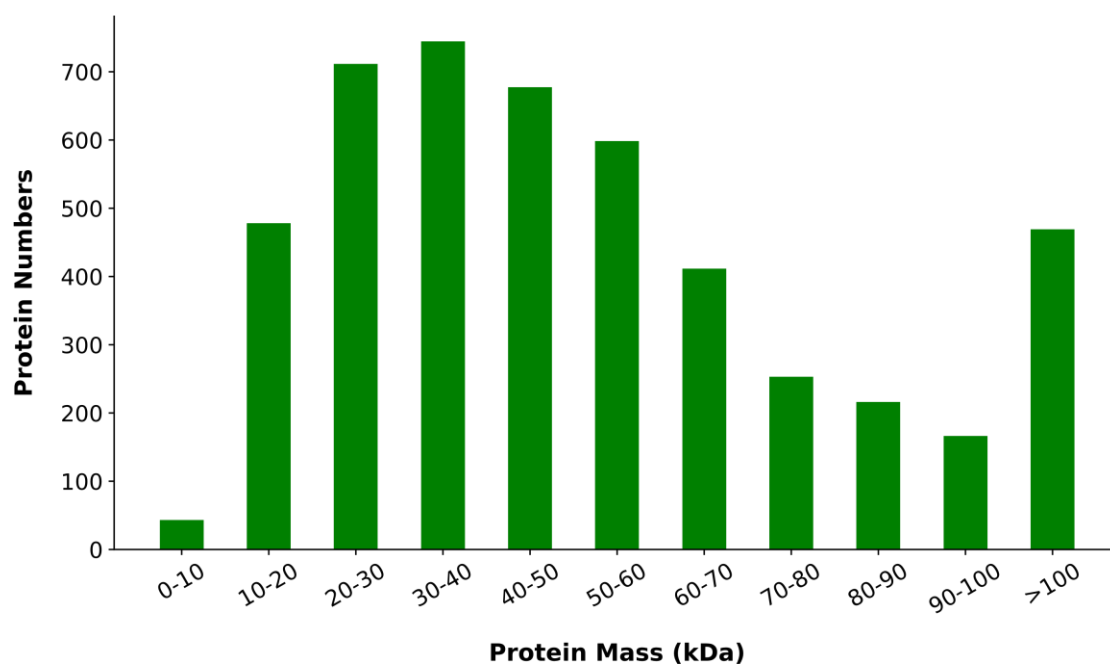

**Figure S1.** The distribution of protein mass in hybrid paper mulberry.

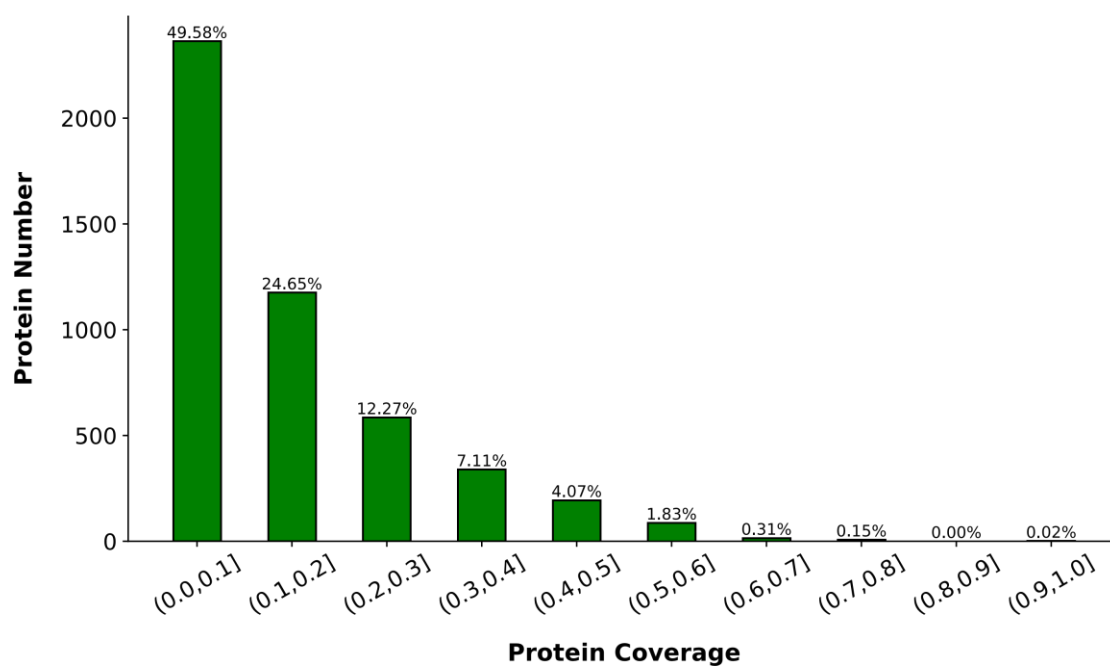

**Figure S2.** The distribution of peptide number in hybrid paper mulberry.

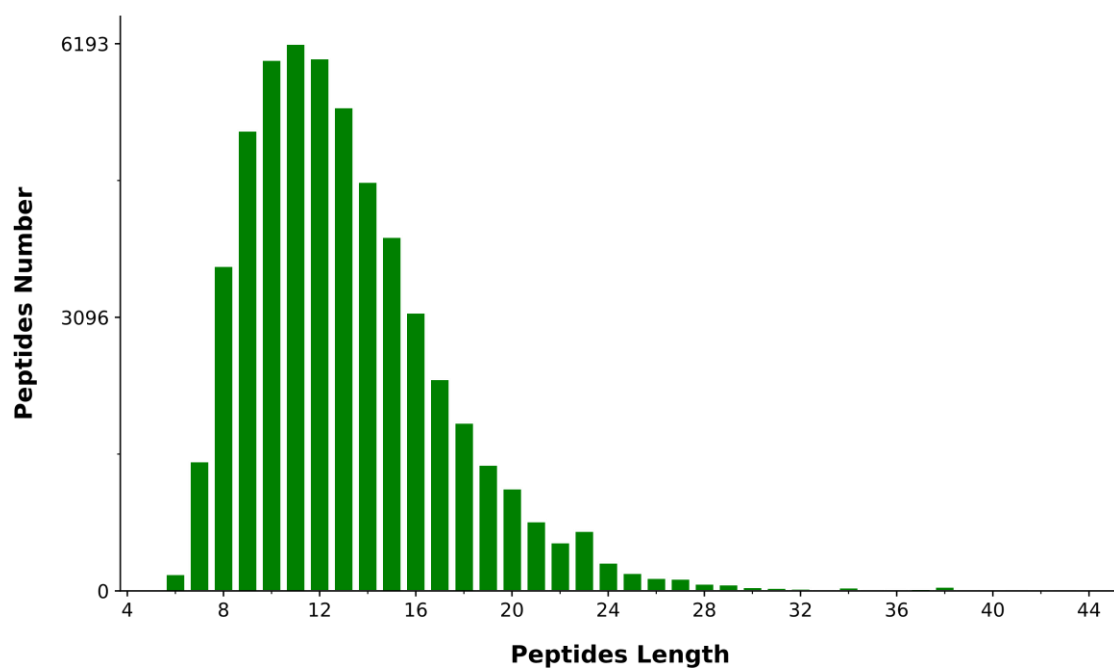

**Figure S3.** The distribution of peptide length in hybrid paper mulberry.

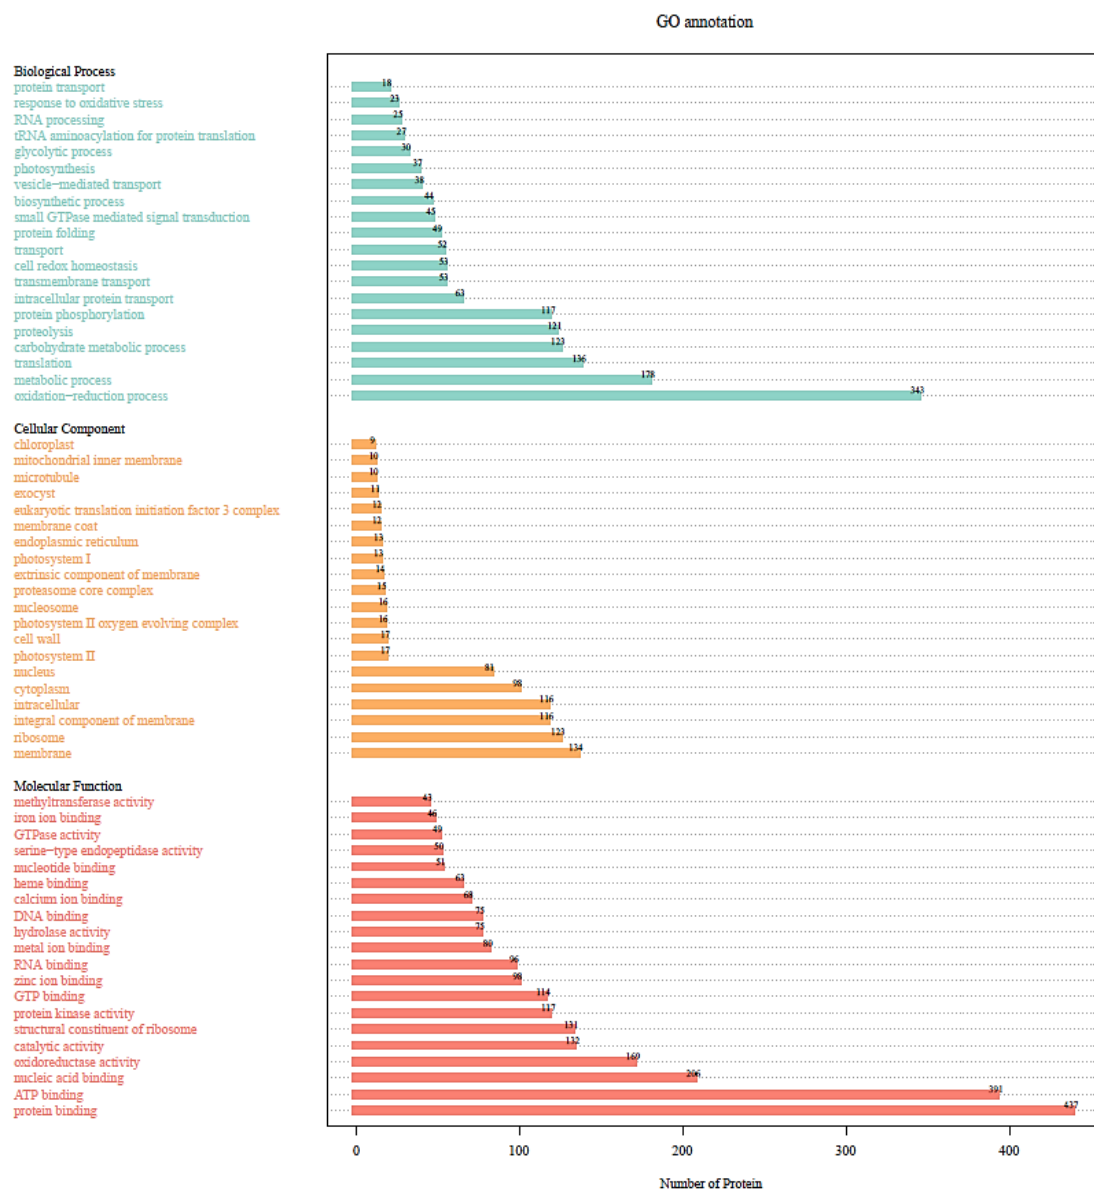

**Figure S4.** Gene ontology (GO) classification of proteins in hybrid paper mulberry.

### COG function classification

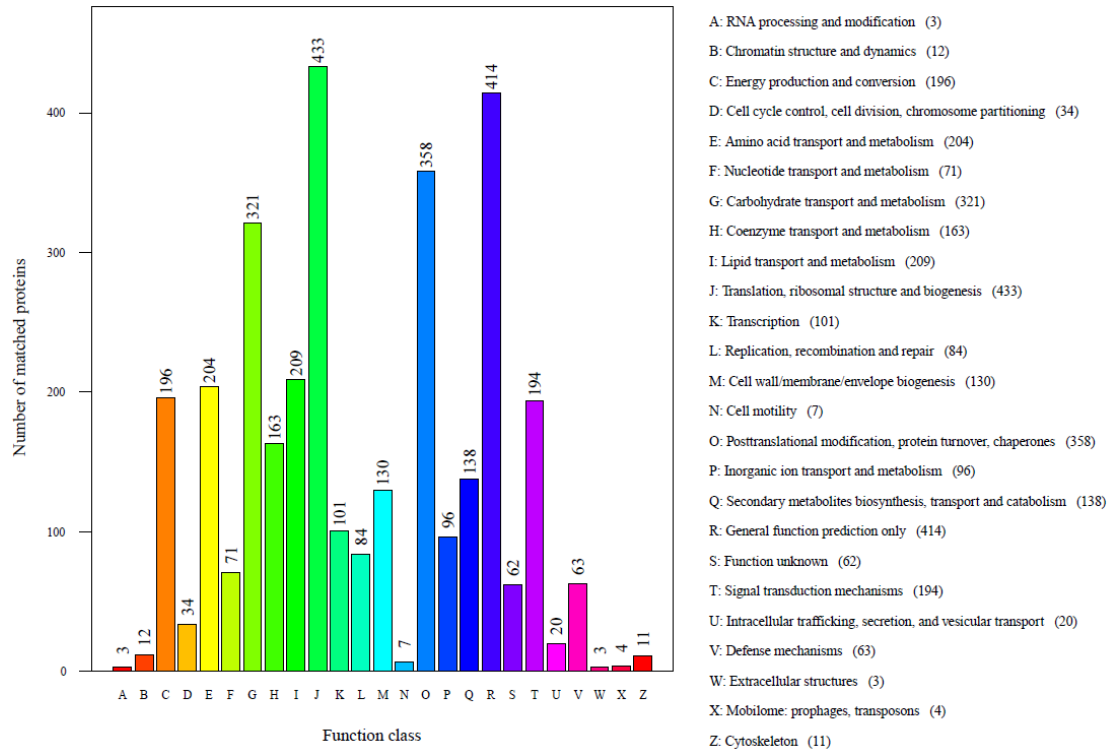

**Figure S5.** Clusters of Orthologous Groups of proteins (COG) classification of proteins in hybrid paper mulberry. A: RNA processing and modification; B: Chromatin structure and dynamics; C: Energy production and conversion; D: Cell cycle control, cell division, chromosome partitioning; E: Amino acid transport and metabolism; F: Nucleotide transport and metabolism; G: Carbohydrate transport and metabolism; H: Coenzyme transport and metabolism; I: Lipid transport and metabolism; J: Translation, ribosomal structure and biogenesis; K: Transcription; L: Replication, recombination and repair; M: Cell wall/membrane/envelope biogenesis; N: Cell motility; O: Posttranslational modification, protein turnover, chaperones; P: Inorganic ion transport and metabolism; Q: Secondary metabolites biosynthesis, transport and catabolism; R: General function prediction only; S: Function unknown; T: Signal transduction mechanisms; U: Intracellular trafficking, secretion, and vesicular transport; V: Defense mechanisms; W: Extracellular structures; X: Mobilome: prophages, transposons; Z: Cytoskeleton.

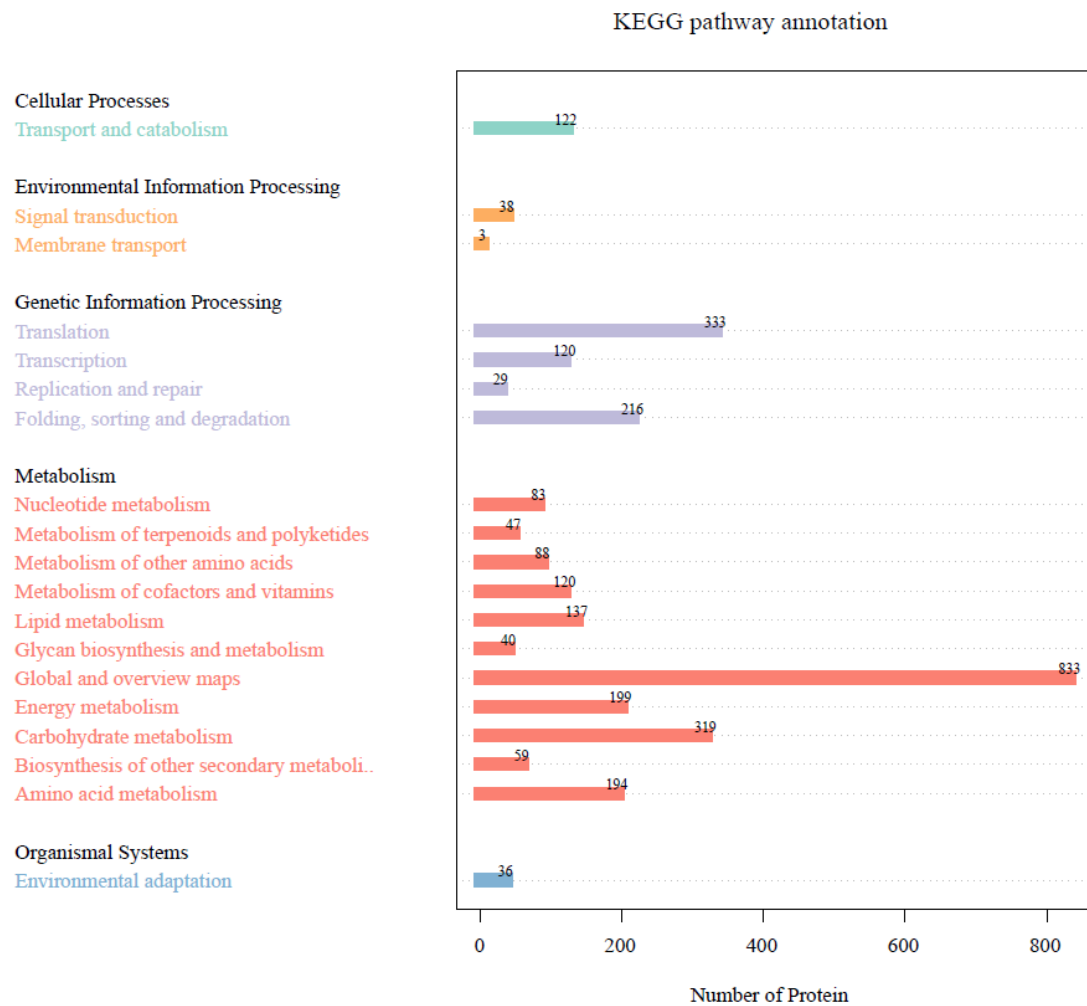

**Figure S6.** Pathways enrichment analysis of proteins in hybrid paper mulberry.
