# Supplementary material for: iTRAQ-Based Quantitative Proteomics Analysis Reveals the Mechanism of Golden-Yellow Leaf Mutant in Hybrid Paper Mulberry
Source: Int J Mol Sci. 2021 Dec 23;23(1):127. doi: 10.3390/ijms23010127 (PMC8745438; doi:10.3390/ijms23010127)
Supplement: Supplementary file 1 [file ijms-23-00127-s001.zip › Table S1.xlsx]

## Sheet: DAPs
	Table S1 The differentially accumulated proteins analysis between green and mutant leaves
Protein	Description	Gene	G_1	G_2	G_3	M_1	M_2	M_3	M.vs.G FC	M.vs.G P-value	M.vs.G UP.DOWN	GO_Description	KEGG_Description	COG_Function_Description	COG_Class_Description
Bp1100007.1	Heat shock cognate 70 kDa protein GN=HSP70 OS=Petunia hybrida (Petunia) PE=2 SV=1	Bp1100007	624.1	668	580.4	792.7	823.5	706	1.24016	0.0301114	up	--	heat shock 70kDa protein 1/2/6/8	Molecular chaperone DnaK (HSP70)	Posttranslational modification, protein turnover, chaperones ;
Bp04g1032.1	Magnesium-chelatase subunit ChlH, chloroplastic (Precursor) GN=At5g13630 OS=Arabidopsis thaliana (Mouse-ear cress) PE=1 SV=1	Bp04g1032	8089.4	7867.5	8139.9	10147	9769.6	9299.6	1.21245	0.0127994	up	Biological Process:biosynthetic process (GO:0009058),Molecular Function:magnesium chelatase activity (GO:0016851)	magnesium chelatase subunit H	Cobalamin biosynthesis protein CobN, Mg-chelatase	Coenzyme transport and metabolism ;
Bp01g0004.1	Chlorophyll a-b binding protein CP26, chloroplastic (Precursor) GN=LHCB5 OS=Arabidopsis thaliana (Mouse-ear cress) PE=1 SV=1	Bp01g0004	7919.4	9026	9036.3	5304.9	5343.3	5164.5	0.608609	0.01049	down	Cellular Component:membrane (GO:0016020)	light-harvesting complex II chlorophyll a/b binding protein 5	--	--
Bp2440003.1	Tubulin beta-1 chain GN=TUBB1 OS=Zea mays (Maize) PE=1 SV=1	Bp2440003	543.1	519.4	477.2	634.2	593.1	652	1.22056	0.0123737	up	Molecular Function:GTPase activity (GO:0003924),Molecular Function:structural constituent of cytoskeleton (GO:0005200),Molecular Function:GTP binding (GO:0005525),Cellular Component:microtubule (GO:0005874),Biological Process:microtubule-based process (GO:0007017)	tubulin beta	--	--
Bp03g2348.1	Photosystem II CP47 reaction center protein {ECO:0000255|HAMAP-Rule:MF_01495} GN=MoinCp047 OS=Morus indica (Mulberry) PE=3 SV=1	Bp03g2348	7904.2	8318.4	8827	6549.1	5920	5954.4	0.735481	0.0034846	down	Cellular Component:photosystem (GO:0009521),Biological Process:photosynthetic electron transport chain (GO:0009767),Cellular Component:membrane (GO:0016020),Molecular Function:chlorophyll binding (GO:0016168)	--	--	--
Bp08g1096.1	Oxygen-evolving enhancer protein 3-2, chloroplastic (Precursor) GN=C17L7.100 OS=Arabidopsis thaliana (Mouse-ear cress) PE=1 SV=2	Bp08g1096	5056.9	5580.6	5481.7	4354.4	4326.8	4126.1	0.794537	0.0103109	down	Molecular Function:calcium ion binding (GO:0005509),Cellular Component:photosystem II (GO:0009523),Cellular Component:photosystem II oxygen evolving complex (GO:0009654),Biological Process:photosynthesis (GO:0015979),Cellular Component:extrinsic component of membrane (GO:0019898)	--	--	--
Bp02g2427.1	14-3-3-like protein OS=Pisum sativum (Garden pea) PE=2 SV=1	Bp02g2427	2690.5	2577.1	2472.8	3195.5	3421.7	3101.8	1.25562	0.0067668	up	Molecular Function:protein domain specific binding (GO:0019904)	14-3-3 protein epsilon	--	--
Bp1950001.1	Photosystem II D2 protein {ECO:0000255|HAMAP-Rule:MF_01383} OS=Glycine max (Soybean) PE=3 SV=1	Bp1950001	5258.3	5676.1	6009.5	4704.8	4444	4299.2	0.793678	0.0169184	down	Biological Process:photosynthetic electron transport in photosystem II (GO:0009772)	photosystem II P680 reaction center D2 protein	--	--
Bp03g2175.1	Photosystem II protein D1 {ECO:0000255|HAMAP-Rule:MF_01379} (Precursor) GN=Poptr_cp001 OS=Populus trichocarpa (Western balsam poplar) PE=2 SV=1	Bp03g2175	5526	5892.2	6058.7	4862.3	4572.7	4695.8	0.808542	0.00783019	down	Biological Process:photosynthetic electron transport in photosystem II (GO:0009772)	photosystem II P680 reaction center D1 protein	--	--
Bp10g0361.1	Chlorophyll a-b binding protein 8, chloroplastic (Precursor) GN=CAB8 OS=Solanum lycopersicum (Tomato) PE=3 SV=1	Bp10g0361	3849.6	4208.5	4286.5	1962.6	1818.9	1789.9	0.451323	0.00118545	down	Cellular Component:membrane (GO:0016020)	light-harvesting complex I chlorophyll a/b binding protein 3	--	--
Bp03g0811.1	Uroporphyrinogen decarboxylase, chloroplastic (Precursor) GN=DCUP OS=Nicotiana tabacum (Common tobacco) PE=1 SV=1	Bp03g0811	2056.8	2216.6	2029.6	2633.4	2622.3	2394.5	1.21374	0.0118469	up	Molecular Function:uroporphyrinogen decarboxylase activity (GO:0004853),Biological Process:porphyrin-containing compound biosynthetic process (GO:0006779)	uroporphyrinogen decarboxylase	Uroporphyrinogen-III decarboxylase	Coenzyme transport and metabolism ;
Bp13g1009.1	Photosystem I reaction center subunit II, chloroplastic (Precursor) GN=psaD OS=Cucumis sativus (Cucumber) PE=1 SV=1	Bp13g1009	3147.5	3954.3	3603.5	2290.4	2414.2	2217.1	0.646568	0.0269244	down	Cellular Component:photosystem I (GO:0009522),Cellular Component:photosystem I reaction center (GO:0009538),Biological Process:photosynthesis (GO:0015979)	photosystem I subunit II	--	--
Bp06g1417.1	Chlorophyll a-b binding protein CP29.2, chloroplastic (Precursor) GN=LHCB4.2 OS=Arabidopsis thaliana (Mouse-ear cress) PE=1 SV=1	Bp06g1417	4422.5	4677.8	4808.2	2250.5	2080	2086.9	0.461401	0.000337689	down	Cellular Component:membrane (GO:0016020)	light-harvesting complex II chlorophyll a/b binding protein 4	--	--
Bp03g0903.1	Chlorophyll a-b binding protein CP29.3, chloroplastic (Precursor) GN=LHCB4.3 OS=Arabidopsis thaliana (Mouse-ear cress) PE=2 SV=1	Bp03g0903	1565.6	1777.7	2036.9	1301	1183.4	1178.1	0.680737	0.0429943	down	Cellular Component:membrane (GO:0016020)	light-harvesting complex II chlorophyll a/b binding protein 4	--	--
Bp12g0957.1	UDP-glucose 6-dehydrogenase 1 GN=UGD1 OS=Glycine max (Soybean) PE=1 SV=1	Bp12g0957	370.1	311.4	346.5	269.4	257.9	277.4	0.782782	0.0378449	down	Molecular Function:NAD binding (GO:0051287),Biological Process:oxidation-reduction process (GO:0055114)	UDPglucose 6-dehydrogenase	UDP-glucose 6-dehydrogenase	Cell wall/membrane/envelope biogenesis ;
Bp04g1903.1	Ras-related protein RABE1c GN=F12M12.30 OS=Arabidopsis thaliana (Mouse-ear cress) PE=1 SV=1	Bp04g1903	59.8	75.4	59.9	106.8	95.8	89.4	1.49667	0.0112571	up	Molecular Function:GTP binding (GO:0005525),Biological Process:small GTPase mediated signal transduction (GO:0007264)	Ras-related protein Rab-8A	GTPase SAR1 family domain	General function prediction only ;
Bp10g0303.1	Chlorophyll a-b binding protein 151, chloroplastic (Precursor) GN=CAB-151 OS=Gossypium hirsutum (Upland cotton) PE=2 SV=2	Bp10g0303	913.2	1254.7	1002.7	456.1	432.6	435	0.417492	0.0259611	down	Cellular Component:membrane (GO:0016020)	light-harvesting complex II chlorophyll a/b binding protein 2	--	--
Bp08g1718.1	Chlorophyll a-b binding protein 40, chloroplastic (Precursor) GN=CAB40 OS=Nicotiana tabacum (Common tobacco) PE=2 SV=1	Bp08g1718	3408.3	3549.9	3427.3	1537.5	1364.5	1393.7	0.413625	1.11e-05	down	Cellular Component:membrane (GO:0016020)	light-harvesting complex II chlorophyll a/b binding protein 1	--	--
Bp11g0285.1	Chlorophyll a-b binding protein CP24 10A, chloroplastic (Precursor) GN=CAP10A OS=Solanum lycopersicum (Tomato) PE=3 SV=1	Bp11g0285	1834.7	2131.4	1983.2	1042.9	1025.6	959.2	0.508917	0.00457625	down	Cellular Component:membrane (GO:0016020)	light-harvesting complex II chlorophyll a/b binding protein 6	--	--
Bp04g0153.1	Photosystem II CP43 reaction center protein {ECO:0000255|HAMAP-Rule:MF_01496} (Precursor) OS=Lotus japonicus (Lotus corniculatus var. japonicus) PE=1 SV=2	Bp04g0153	2939.7	3342.4	3273.1	2230.3	2391.8	2236.2	0.717756	0.00952632	down	Cellular Component:photosystem (GO:0009521),Biological Process:photosynthetic electron transport chain (GO:0009767),Cellular Component:membrane (GO:0016020),Molecular Function:chlorophyll binding (GO:0016168)	photosystem II CP43 chlorophyll apoprotein	--	--
Bp13g1309.1	60S ribosomal protein L19-2 GN=RPL19B OS=Arabidopsis thaliana (Mouse-ear cress) PE=2 SV=1	Bp13g1309	1044.4	953.9	926.8	1182.4	1243.9	1133.8	1.21709	0.0116971	up	Molecular Function:structural constituent of ribosome (GO:0003735),Cellular Component:intracellular (GO:0005622),Cellular Component:ribosome (GO:0005840),Biological Process:translation (GO:0006412)	large subunit ribosomal protein L19e	Ribosomal protein L19E	Translation, ribosomal structure and biogenesis ;
Bp06g0609.1	60S ribosomal protein L15 GN=RPL15 OS=Petunia hybrida (Petunia) PE=2 SV=1	Bp06g0609	1812.4	1914.4	1736.7	2244.5	2265.3	2106.5	1.211	0.00585169	up	Molecular Function:structural constituent of ribosome (GO:0003735),Cellular Component:ribosome (GO:0005840),Biological Process:translation (GO:0006412)	large subunit ribosomal protein L15e	Ribosomal protein L15E	Translation, ribosomal structure and biogenesis ;
Bp1950003.1	Photosystem I P700 chlorophyll a apoprotein A1 {ECO:0000255|HAMAP-Rule:MF_00458} OS=Glycine max (Soybean) PE=3 SV=1	Bp1950003	1888.3	2229.6	2151.6	1170.5	1171.6	1084.2	0.546503	0.0078597	down	Cellular Component:photosystem I (GO:0009522),Cellular Component:thylakoid (GO:0009579),Biological Process:photosynthesis (GO:0015979),Cellular Component:integral component of membrane (GO:0016021),Molecular Function:metal ion binding (GO:0046872)	photosystem I P700 chlorophyll a apoprotein A1	Outer membrane protein OmpA and related peptidoglycan-associated (lipo)proteins	Cell wall/membrane/envelope biogenesis ;
Bp07g1732.1	Fructokinase-like 2, chloroplastic {ECO:0000312|EMBL:AEE34893.1} (Precursor) OS=Arabidopsis thaliana (Mouse-ear cress) PE=1 SV=2	Bp07g1732	638	676.2	608.6	755	806.1	750.6	1.20226	0.00823251	up	--	--	Sugar or nucleoside kinase, ribokinase family	Carbohydrate transport and metabolism ;
Bp08g2173.1	Photosystem I reaction center subunit III, chloroplastic (Precursor) GN=PSAF OS=Arabidopsis thaliana (Mouse-ear cress) PE=1 SV=1	Bp08g2173	1939.4	2484	2311.1	1413.2	1340.7	1299.9	0.601945	0.0267598	down	Cellular Component:photosystem I (GO:0009522),Cellular Component:photosystem I reaction center (GO:0009538),Biological Process:photosynthesis (GO:0015979)	photosystem I subunit III	--	--
Bp10g0402.1	Gamma aminobutyrate transaminase 3, chloroplastic (Precursor) GN=GABA-TP3 OS=Solanum lycopersicum (Tomato) PE=1 SV=1	Bp10g0402	1523.5	1532.2	1553.3	1265.9	1201.2	1329.4	0.823714	0.0142352	down	Molecular Function:transaminase activity (GO:0008483),Molecular Function:pyridoxal phosphate binding (GO:0030170)	4-aminobutyrate---pyruvate transaminase	Adenosylmethionine-8-amino-7-oxononanoate aminotransferase	Coenzyme transport and metabolism ;
Bp1950002.1	Photosystem I P700 chlorophyll a apoprotein A2 {ECO:0000255|HAMAP-Rule:MF_00482} OS=Glycine max (Soybean) PE=3 SV=1	Bp1950002	2072.1	2461.2	2433.2	1433.9	1345.6	1307	0.586593	0.0112898	down	Cellular Component:photosystem I (GO:0009522),Cellular Component:thylakoid (GO:0009579),Biological Process:photosynthesis (GO:0015979),Cellular Component:integral component of membrane (GO:0016021)	photosystem I P700 chlorophyll a apoprotein A2	Outer membrane protein OmpA and related peptidoglycan-associated (lipo)proteins	Cell wall/membrane/envelope biogenesis ;
Bp03g1311.1	Chlorophyll a-b binding protein 6A, chloroplastic (Precursor) GN=CAB6A OS=Solanum lycopersicum (Tomato) PE=2 SV=1	Bp03g1311	2205.5	2835.4	2496	1312.5	1428.2	1244.3	0.528732	0.0165241	down	Cellular Component:membrane (GO:0016020)	light-harvesting complex I chlorophyll a/b binding protein 1	--	--
Bp05g0031.1	Photosystem I reaction center subunit V, chloroplastic (Precursor) OS=Arabidopsis thaliana (Mouse-ear cress) PE=2 SV=1	Bp05g0031	1630.9	1783.9	1839.8	1061.4	972	912.9	0.560709	0.000948953	down	Cellular Component:photosystem I (GO:0009522),Biological Process:photosynthesis (GO:0015979),Cellular Component:membrane (GO:0016020)	photosystem I subunit V	--	--
Bp12g0914.1	Chlorophyll a-b binding protein P4, chloroplastic (Precursor) OS=Pisum sativum (Garden pea) PE=1 SV=1	Bp12g0914	905.2	992.6	977.1	484.9	490.8	468.3	0.502278	0.00196688	down	Cellular Component:membrane (GO:0016020)	light-harvesting complex I chlorophyll a/b binding protein 4	--	--
Bp07g0136.1	Chlorophyll a-b binding protein 7, chloroplastic (Precursor) GN=CAB7 OS=Solanum lycopersicum (Tomato) PE=3 SV=1	Bp07g0136	1415.2	1752.6	1552.8	1011.1	1068.1	998.5	0.651972	0.0260329	down	Cellular Component:membrane (GO:0016020)	light-harvesting complex I chlorophyll a/b binding protein 2	--	--
Bp01g1528.1	Photosystem II 10 kDa polypeptide, chloroplastic (Precursor) GN=PSBR OS=Nicotiana tabacum (Common tobacco) PE=2 SV=1	Bp01g1528	1386.4	1637.3	1577.5	1323.4	1285.6	1123.8	0.811267	0.0432328	down	Cellular Component:photosystem II (GO:0009523),Cellular Component:photosystem II oxygen evolving complex (GO:0009654),Biological Process:photosynthesis (GO:0015979),Cellular Component:thylakoid membrane (GO:0042651)	photosystem II 10kDa protein	--	--
Bp13g0174.1	Tetrapyrrole-binding protein, chloroplastic (Precursor) GN=GUN4 OS=Arabidopsis thaliana (Mouse-ear cress) PE=1 SV=1	Bp13g0174	595.7	655.6	630.1	803.5	741.4	713.8	1.20054	0.0220613	up	--	--	Serine/threonine protein kinase	Signal transduction mechanisms ;
Bp09g0929.1	DEAD-box ATP-dependent RNA helicase 52A OS=Oryza sativa subsp. japonica (Rice) PE=2 SV=2	Bp09g0929	611	612.7	629.4	501.7	456.9	482.6	0.777724	0.00320516	down	Molecular Function:nucleic acid binding (GO:0003676),Molecular Function:ATP binding (GO:0005524)	ATP-dependent RNA helicase DDX5/DBP2	Superfamily II DNA and RNA helicase	Replication, recombination and repair ;
Bp06g1120.1	Serine/threonine-protein kinase STN8, chloroplastic (Precursor) GN=STN8 OS=Arabidopsis thaliana (Mouse-ear cress) PE=2 SV=1	Bp06g1120	446.2	434.4	456	373.9	352.2	364.4	0.815876	0.00075554	down	Molecular Function:protein kinase activity (GO:0004672),Molecular Function:ATP binding (GO:0005524),Biological Process:protein phosphorylation (GO:0006468)	--	Serine/threonine protein kinase	Signal transduction mechanisms ;
Bp09g1624.1	Probable fructokinase-4 OS=Arabidopsis thaliana (Mouse-ear cress) PE=2 SV=1	Bp09g1624	274	250.5	292.8	229.4	209.7	228.3	0.816591	0.0359492	down	Molecular Function:ribokinase activity (GO:0004747),Biological Process:D-ribose metabolic process (GO:0006014)	fructokinase	Sugar or nucleoside kinase, ribokinase family	Carbohydrate transport and metabolism ;
Bp01g2472.1	Zeaxanthin epoxidase, chloroplastic (Precursor) OS=Prunus armeniaca (Apricot) PE=2 SV=1	Bp01g2472	828.2	918.5	844.4	703.1	694.5	659	0.793717	0.0114435	down	Molecular Function:protein binding (GO:0005515),Molecular Function:FAD binding (GO:0071949)	zeaxanthin epoxidase	2-polyprenyl-6-methoxyphenol hydroxylase and related FAD-dependent oxidoreductases	Coenzyme transport and metabolism ; Energy production and conversion ;
Bp0730011.1	Chlorophyll a-b binding protein 13, chloroplastic (Precursor) GN=CAB13 OS=Solanum lycopersicum (Tomato) PE=1 SV=1	Bp0730011	1700	1919.2	1890.4	559.4	527.6	520.7	0.2918	0.00218683	down	Cellular Component:membrane (GO:0016020)	light-harvesting complex II chlorophyll a/b binding protein 3	--	--
Bp03g0620.1	-	Bp03g0620	853.4	779	987.8	612.7	587.3	685.6	0.71964	0.0389679	down	Molecular Function:endopeptidase inhibitor activity (GO:0004866)	--	--	--
Bp04g1676.1	Ras-related protein RABC2a GN=F12E4.310 OS=Arabidopsis thaliana (Mouse-ear cress) PE=1 SV=1	Bp04g1676	95.3	107.9	100.7	135.6	131.3	138.3	1.33333	0.00336082	up	Molecular Function:GTP binding (GO:0005525),Biological Process:small GTPase mediated signal transduction (GO:0007264)	Ras-related protein Rab-18	GTPase SAR1 family domain	General function prediction only ;
Bp06g0498.1	Importin subunit beta-1 {ECO:0000305} OS=Arabidopsis thaliana (Mouse-ear cress) PE=1 SV=1	Bp06g0498	54.2	69.6	59.1	48.1	38.7	46.5	0.728814	0.0463801	down	Biological Process:intracellular protein transport (GO:0006886),Biological Process:nucleocytoplasmic transport (GO:0006913),Molecular Function:Ran GTPase binding (GO:0008536),Molecular Function:protein transporter activity (GO:0008565)	importin subunit beta-1	--	--
Bp01g0403.1	Vacuolar protein sorting-associated protein 32 homolog 2 GN=At4g29160 OS=Arabidopsis thaliana (Mouse-ear cress) PE=1 SV=1	Bp01g0403	418.7	479.5	435	581.9	560.8	553.8	1.2725	0.010764	up	Biological Process:vacuolar transport (GO:0007034)	charged multivesicular body protein 4	--	--
Bp10g0503.1	Chlorophyll a-b binding protein 21, chloroplastic (Precursor) GN=CAB21 OS=Nicotiana tabacum (Common tobacco) PE=2 SV=1	Bp10g0503	695.2	784.1	712.7	372.9	331.6	354.1	0.482938	0.00161044	down	Cellular Component:membrane (GO:0016020)	light-harvesting complex II chlorophyll a/b binding protein 1	--	--
Bp03g0641.1	Miraculin (Precursor) OS=Synsepalum dulcificum (Miracle fruit) PE=1 SV=3	Bp03g0641	748.4	711.7	718.7	542.4	630.2	595.7	0.811594	0.0198746	down	Molecular Function:endopeptidase inhibitor activity (GO:0004866)	--	--	--
Bp10g1760.1	30S ribosomal protein S21, chloroplastic (Fragment) GN=rps21 OS=Spinacia oleracea (Spinach) PE=1 SV=1	Bp10g1760	466.8	476.6	464.1	619.8	717.8	590.1	1.36959	0.0449037	up	Molecular Function:structural constituent of ribosome (GO:0003735),Cellular Component:ribosome (GO:0005840),Biological Process:translation (GO:0006412)	--	Ribosomal protein S21	Translation, ribosomal structure and biogenesis ;
Bp0300003.1	Asparagine synthetase [glutamine-hydrolyzing] OS=Asparagus officinalis (Garden asparagus) PE=2 SV=2	Bp0300003	465.3	415.2	498.4	304.8	324.4	360	0.717383	0.0150926	down	Molecular Function:asparagine synthase (glutamine-hydrolyzing) activity (GO:0004066),Biological Process:asparagine biosynthetic process (GO:0006529)	asparagine synthase (glutamine-hydrolysing)	Asparagine synthetase B (glutamine-hydrolyzing)	Amino acid transport and metabolism ;
Bp03g1569.1	Alkaline/neutral invertase E, chloroplastic {ECO:0000305} (Precursor) OS=Arabidopsis thaliana (Mouse-ear cress) PE=1 SV=1	Bp03g1569	130.3	147.6	135.2	112	110.7	112.5	0.811426	0.0358955	down	Molecular Function:glycopeptide alpha-N-acetylgalactosaminidase activity (GO:0033926)	--	Glycogen debranching enzyme (alpha-1,6-glucosidase)	Carbohydrate transport and metabolism ;
Bp08g1678.1	-	Bp08g1678	663.2	708	637.1	514.8	503.6	482	0.7471	0.00620443	down	Biological Process:rRNA processing (GO:0006364)	--	Ribosomal 30S subunit maturation factor RimM, required for 16S rRNA processing	Translation, ribosomal structure and biogenesis ;
Bp03g0415.1	Short-chain dehydrogenase TIC 32, chloroplastic GN=TIC32 OS=Pisum sativum (Garden pea) PE=1 SV=1	Bp03g0415	177.3	189.7	208.9	167.2	141.3	158.5	0.810905	0.0400864	down	--	WW domain-containing oxidoreductase	NAD(P)-dependent dehydrogenase, short-chain alcohol dehydrogenase family	Lipid transport and metabolism ; Secondary metabolites biosynthesis, transport and catabolism ; General function prediction only ;
Bp04g1354.1	Ubiquitin-conjugating enzyme E2 variant 1C GN=F11F19.3 OS=Arabidopsis thaliana (Mouse-ear cress) PE=1 SV=1	Bp04g1354	800.5	752	668.6	592.7	555.6	559.6	0.768943	0.0376912	down	--	ubiquitin-conjugating enzyme E2 variant	--	--
Bp09g1872.1	Photosystem I reaction center subunit XI, chloroplastic (Precursor) GN=PSAL OS=Spinacia oleracea (Spinach) PE=1 SV=1	Bp09g1872	240.9	324.3	297.6	175.5	211.3	160.4	0.634214	0.0300403	down	Cellular Component:photosystem I (GO:0009522),Cellular Component:photosystem I reaction center (GO:0009538),Biological Process:photosynthesis (GO:0015979)	photosystem I subunit XI	--	--
Bp09g0155.1	Probable 2-carboxy-D-arabinitol-1-phosphatase {ECO:0000305} (Precursor) OS=Arabidopsis thaliana (Mouse-ear cress) PE=1 SV=1	Bp09g0155	40.9	45.7	40.8	38.4	32.2	32.1	0.806122	0.038473	down	--	2-carboxy-D-arabinitol-1-phosphatase	Broad specificity phosphatase PhoE	Carbohydrate transport and metabolism ;
Bp10g0612.1	Multiprotein-bridging factor 1b GN=MBF1B OS=Arabidopsis thaliana (Mouse-ear cress) PE=2 SV=1	Bp10g0612	495.5	511.8	468.8	722.1	778.8	629.4	1.44319	0.0297715	up	Molecular Function:sequence-specific DNA binding (GO:0043565)	putative transcription factor	Archaeal ribosome-binding protein aMBF1, putative translation factor, contains Zn-ribbon and HTH domains	Translation, ribosomal structure and biogenesis ;
Bp10g0842.1	-	Bp10g0842	413.6	468.5	416.1	365.5	333.2	364	0.818595	0.0284116	down	--	--	Predicted enzyme of the cupin superfamily	General function prediction only ;
Bp09g1648.1	-	Bp09g1648	398.8	467.5	437.8	374	327.9	365.6	0.818572	0.0370202	down	Molecular Function:RNA ligase (ATP) activity (GO:0003972),Molecular Function:ATP binding (GO:0005524)	--	--	--
Bp13g1388.1	-	Bp13g1388	220.6	223.7	211.9	291.9	259.7	254.1	1.22783	0.0420887	up	--	--	--	--
Bp09g0948.1	40S ribosomal protein S26-1 GN=RPS26A OS=Arabidopsis thaliana (Mouse-ear cress) PE=2 SV=2	Bp09g0948	105	103.1	96.9	125.3	129	138.2	1.28689	0.0052259	up	Molecular Function:structural constituent of ribosome (GO:0003735),Cellular Component:intracellular (GO:0005622),Cellular Component:ribosome (GO:0005840),Biological Process:translation (GO:0006412)	small subunit ribosomal protein S26e	--	--
Bp06g0778.1	Subtilisin-like protease (Precursor) GN=At5g67360 OS=Arabidopsis thaliana (Mouse-ear cress) PE=1 SV=1	Bp06g0778	76.3	71.3	86.1	55	48.1	66.1	0.724005	0.0359304	down	Molecular Function:serine-type endopeptidase activity (GO:0004252),Biological Process:proteolysis (GO:0006508)	--	Serine protease, subtilisin family	Posttranslational modification, protein turnover, chaperones ;
Bp01g2010.1	-	Bp01g2010	379.1	349.1	361.8	300.9	279.1	303.4	0.810459	0.00425119	down	Biological Process:acyl-CoA metabolic process (GO:0006637),Molecular Function:acyl-CoA hydrolase activity (GO:0047617)	acyl-coenzyme A thioesterase 1/2/4	Acyl-CoA thioesterase	Lipid transport and metabolism ;
Bp07g0038.1	Light-regulated protein (Precursor) OS=Oryza sativa subsp. japonica (Rice) PE=2 SV=1	Bp07g0038	269.2	250.8	231.5	369.3	448.2	354	1.55888	0.0289041	up	--	--	--	--
Bp03g2339.1	Cysteine proteinase inhibitor 12 (Precursor) OS=Oryza sativa subsp. japonica (Rice) PE=2 SV=1	Bp03g2339	149.4	164.4	166	197.4	218.5	193.9	1.27095	0.0128627	up	Molecular Function:cysteine-type endopeptidase inhibitor activity (GO:0004869)	--	--	--
Bp01g0408.1	60S ribosomal protein L31-1 GN=RPL31A OS=Arabidopsis thaliana (Mouse-ear cress) PE=3 SV=1	Bp01g0408	434.6	513.2	432.3	605	670.3	625.9	1.37758	0.00790992	up	Molecular Function:structural constituent of ribosome (GO:0003735),Cellular Component:ribosome (GO:0005840),Biological Process:translation (GO:0006412)	large subunit ribosomal protein L31e	Ribosomal protein L31E	Translation, ribosomal structure and biogenesis ;
Bp05g1795.1	-	Bp05g1795	168.1	162	145	250	306.1	269.2	1.73711	0.0101552	up	--	--	Secreted protein containing bacterial Ig-like domain and vWFA domain	General function prediction only ;
Bp02g2502.1	Probable methyltransferase PMT1 GN=At3g23300 OS=Arabidopsis thaliana (Mouse-ear cress) PE=2 SV=2	Bp02g2502	291.1	302.5	280.1	236	209.5	229.4	0.772462	0.00340712	down	Molecular Function:methyltransferase activity (GO:0008168)	--	--	--
Bp04g1463.1	-	Bp04g1463	350.6	355.1	339	262.7	234.2	254.2	0.718962	0.00164344	down	--	--	--	--
Bp03g1589.1	Copper transport protein ATX1 GN=ATX1 OS=Arabidopsis thaliana (Mouse-ear cress) PE=1 SV=1	Bp03g1589	368.8	405.9	400.8	487.6	474.5	449.9	1.20119	0.00798882	up	Biological Process:metal ion transport (GO:0030001),Molecular Function:metal ion binding (GO:0046872)	copper chaperone	Copper chaperone CopZ	Inorganic ion transport and metabolism ;
Bp08g0733.1	Photosystem I reaction center subunit VI, chloroplastic (Precursor) GN=PSAH OS=Brassica campestris (Field mustard) PE=2 SV=1	Bp08g0733	430.4	420	452.3	259.6	219.2	242.6	0.553773	0.000269904	down	Cellular Component:photosystem I (GO:0009522),Cellular Component:photosystem I reaction center (GO:0009538),Biological Process:photosynthesis (GO:0015979)	photosystem I subunit VI	--	--
Bp02g0401.1	Endochitinase 3 (Precursor) GN=CHN14 OS=Nicotiana tabacum (Common tobacco) PE=3 SV=1	Bp02g0401	689.1	517.2	520.8	282.7	353.1	274.8	0.527242	0.0262328	down	Molecular Function:chitinase activity (GO:0004568),Biological Process:chitin catabolic process (GO:0006032),Molecular Function:chitin binding (GO:0008061),Biological Process:cell wall macromolecule catabolic process (GO:0016998)	basic endochitinase B	Chitodextrinase	Carbohydrate transport and metabolism ;
Bp02g1203.1	Phosphoribosylaminoimidazole-succinocarboxamide synthase, chloroplastic (Precursor) GN=PUR7 OS=Arabidopsis thaliana (Mouse-ear cress) PE=2 SV=2	Bp02g1203	84.6	97.1	92.3	133.6	136.8	109.2	1.3854	0.0407648	up	--	phosphoribosylaminoimidazole-succinocarboxamide synthase	Phosphoribosylaminoimidazole-succinocarboxamide synthase	Nucleotide transport and metabolism ;
Bp08g1381.1	-	Bp08g1381	362.8	352.7	353.2	264.8	294.2	257.4	0.763919	0.0121133	down	Molecular Function:DNA binding (GO:0003677)	--	--	--
Bp12g1375.1	Cytochrome b559 subunit alpha {ECO:0000255|HAMAP-Rule:MF_00642} OS=Glycine max (Soybean) PE=3 SV=1	Bp12g1375	228.7	234.3	283.8	136.6	156.3	149	0.591725	0.0200494	down	Cellular Component:photosystem II (GO:0009523),Biological Process:photosynthetic electron transport chain (GO:0009767),Biological Process:photosynthesis (GO:0015979),Cellular Component:integral component of membrane (GO:0016021),Molecular Function:heme binding (GO:0020037),Molecular Function:metal ion binding (GO:0046872)	photosystem II cytochrome b559 subunit alpha	--	--
Bp01g0041.1	Probable LRR receptor-like serine/threonine-protein kinase At4g08850 (Precursor) GN=At4g08850 OS=Arabidopsis thaliana (Mouse-ear cress) PE=2 SV=3	Bp01g0041	364.3	393.7	417	313.8	294.2	337.1	0.80434	0.0189585	down	Molecular Function:protein binding (GO:0005515)	--	Leucine-rich repeat (LRR) protein	Transcription ;
Bp13g0708.1	Protein PROTON GRADIENT REGULATION 5, chloroplastic (Precursor) GN=PGR5 OS=Arabidopsis thaliana (Mouse-ear cress) PE=1 SV=1	Bp13g0708	548.4	652.4	640.2	411.9	433.6	450.7	0.704074	0.0218422	down	--	--	--	--
Bp03g0238.1	Protein phosphatase 2C 57 GN=PPH1 OS=Arabidopsis thaliana (Mouse-ear cress) PE=2 SV=2	Bp03g0238	240.7	243.9	224.9	193.8	150.1	173.9	0.72981	0.0221347	down	Molecular Function:catalytic activity (GO:0003824),Molecular Function:protein serine/threonine phosphatase activity (GO:0004722),Biological Process:protein dephosphorylation (GO:0006470)	--	Serine/threonine protein phosphatase PrpC	Signal transduction mechanisms ;
Bp07g0749.1	Protein SPIRAL1-like 1 GN=SP1L1 OS=Arabidopsis thaliana (Mouse-ear cress) PE=2 SV=1	Bp07g0749	297.6	282.2	270.3	432.3	582	527.1	1.8132	0.0307884	up	--	protein SPIRAL1 and related proteins	--	--
Bp01g1724.1	Probable leucine-rich repeat receptor-like serine/threonine-protein kinase At3g14840 (Precursor) GN=LRR-RLK OS=Arabidopsis thaliana (Mouse-ear cress) PE=2 SV=1	Bp01g1724	60.1	63.1	57.5	45.1	45	39.8	0.718871	0.00212226	down	Molecular Function:protein kinase activity (GO:0004672),Molecular Function:protein binding (GO:0005515),Molecular Function:ATP binding (GO:0005524),Biological Process:protein phosphorylation (GO:0006468)	--	Leucine-rich repeat (LRR) protein	Transcription ;
Bp08g1873.1	Photosystem I reaction center subunit psaK, chloroplastic (Precursor) GN=PSAK OS=Arabidopsis thaliana (Mouse-ear cress) PE=2 SV=2	Bp08g1873	482.1	418.3	488.9	302.9	301.2	298.2	0.649464	0.0183459	down	Cellular Component:photosystem I (GO:0009522),Biological Process:photosynthesis (GO:0015979),Cellular Component:membrane (GO:0016020)	photosystem I subunit X	--	--
Bp01g0393.1	Gamma-glutamyltranspeptidase 3 GN=F17A13.30 OS=Arabidopsis thaliana (Mouse-ear cress) PE=2 SV=1	Bp01g0393	261.4	265.9	262.7	192.6	180.1	204.3	0.73038	0.00778001	down	Molecular Function:gamma-glutamyltransferase activity (GO:0003840),Biological Process:glutathione metabolic process (GO:0006749)	--	Gamma-glutamyltranspeptidase	Amino acid transport and metabolism ;
Bp01g1638.1	tRNA dimethylallyltransferase 9 GN=IPT9 OS=Arabidopsis thaliana (Mouse-ear cress) PE=2 SV=1	Bp01g1638	292.5	255.9	244.9	333.4	325.1	312.5	1.224	0.0387821	up	Biological Process:tRNA processing (GO:0008033)	tRNA dimethylallyltransferase	tRNA A37 N6-isopentenylltransferase MiaA	Translation, ribosomal structure and biogenesis ;
Bp04g1201.1	Thioredoxin-like 3-1, chloroplastic (Precursor) GN=WCRKC1 OS=Arabidopsis thaliana (Mouse-ear cress) PE=2 SV=3	Bp04g1201	111.2	117.2	115.8	99.8	93.5	83.9	0.805346	0.0276315	down	Biological Process:glycerol ether metabolic process (GO:0006662),Molecular Function:protein disulfide oxidoreductase activity (GO:0015035),Biological Process:cell redox homeostasis (GO:0045454)	--	Negative regulator of GroEL, contains thioredoxin-like and TPR-like domains	Posttranslational modification, protein turnover, chaperones ;
Bp12g1558.1	Glycine-rich RNA-binding protein blt801 {ECO:0000250|UniProtKB:Q03250, ECO:0000303|PubMed:8639753} OS=Hordeum vulgare (Barley) PE=1 SV=1	Bp12g1558	265.4	239.3	305.1	207.1	172.2	195.1	0.709311	0.0351962	down	Molecular Function:nucleic acid binding (GO:0003676)	--	RNA recognition motif (RRM) domain	Translation, ribosomal structure and biogenesis ;
Bp0980015.1	MFP1 attachment factor 1 GN=MAF1 OS=Solanum lycopersicum (Tomato) PE=1 SV=1	Bp0980015	140.5	141.8	156.4	126.9	113.4	120	0.82129	0.0173539	down	--	--	--	--
Bp09g1349.1	Receptor-like protein kinase HERK 1 (Precursor) OS=Arabidopsis thaliana (Mouse-ear cress) PE=1 SV=1	Bp09g1349	62.4	51.6	63.2	49.4	38.8	40	0.723476	0.0318556	down	Molecular Function:protein kinase activity (GO:0004672),Molecular Function:ATP binding (GO:0005524),Biological Process:protein phosphorylation (GO:0006468)	--	Serine/threonine protein kinase	Signal transduction mechanisms ;
Bp09g1496.1	KiTH-2 OS=Actinidia deliciosa (Kiwi) PE=1 SV=1	Bp09g1496	110.6	122.3	84	55.2	48.1	77.6	0.570843	0.0373279	down	--	--	--	--
Bp04g1477.1	Beta-fructofuranosidase, insoluble isoenzyme 1 (Precursor) GN=INV1 OS=Daucus carota (Wild carrot) PE=1 SV=1	Bp04g1477	192.4	200.5	194.5	150.8	163.8	152.6	0.795369	0.00250006	down	Biological Process:carbohydrate metabolic process (GO:0005975)	beta-fructofuranosidase	Sucrose-6-phosphate hydrolase SacC, GH32 family	Carbohydrate transport and metabolism ;
Bp05g0500.1	Electron transfer flavoprotein subunit alpha, mitochondrial (Precursor) GN=ETFA OS=Arabidopsis thaliana (Mouse-ear cress) PE=1 SV=1	Bp05g0500	198.8	199.2	232.8	154.6	160	158.3	0.749683	0.0405402	down	--	electron transfer flavoprotein alpha subunit	Electron transfer flavoprotein, alpha subunit	Energy production and conversion ;
Bp12g1061.1	30S ribosomal protein S12-B, chloroplastic GN=rps12-B OS=Populus trichocarpa (Western balsam poplar) PE=3 SV=1	Bp12g1061	119.2	155.8	124.9	261.4	296.7	197.3	1.88897	0.0411675	up	Molecular Function:structural constituent of ribosome (GO:0003735),Cellular Component:intracellular (GO:0005622),Cellular Component:ribosome (GO:0005840),Biological Process:translation (GO:0006412)	small subunit ribosomal protein S12	Ribosomal protein S12	Translation, ribosomal structure and biogenesis ;
Bp01g2258.1	Uncharacterized protein At3g49720 GN=At3g49720 OS=Arabidopsis thaliana (Mouse-ear cress) PE=2 SV=1	Bp01g2258	176.6	165.7	163.2	140.4	138.1	141.6	0.831058	0.0157447	down	--	--	--	--
Bp02g1891.1	Chlorophyll a-b binding protein 7, chloroplastic (Precursor) GN=CAB7 OS=Solanum lycopersicum (Tomato) PE=3 SV=1	Bp02g1891	128	151.6	126.2	91.9	91.5	103.5	0.706999	0.024208	down	Cellular Component:membrane (GO:0016020)	light-harvesting complex I chlorophyll a/b binding protein 5	--	--
Bp01g1103.1	Cytochrome c biogenesis protein CcsA {ECO:0000255|HAMAP-Rule:MF_01391} GN=MoinCp070 OS=Morus indica (Mulberry) PE=3 SV=1	Bp01g1103	107.2	125.1	111.5	147.7	131.5	136	1.20768	0.0308371	up	Biological Process:cytochrome complex assembly (GO:0017004),Molecular Function:heme binding (GO:0020037)	--	ABC-type transport system involved in cytochrome c biogenesis, permease component	Posttranslational modification, protein turnover, chaperones ;
Bp09g1920.1	-	Bp09g1920	426.4	393.2	457.8	364.8	335.4	350.4	0.822452	0.0388838	down	Molecular Function:oxidoreductase activity (GO:0016491),Biological Process:oxidation-reduction process (GO:0055114)	--	Saccharopine dehydrogenase, NADP-dependent	Amino acid transport and metabolism ;
Bp06g0335.1	Reticulon-like protein B2 GN=F8L21.10 OS=Arabidopsis thaliana (Mouse-ear cress) PE=1 SV=1	Bp06g0335	188.6	213.6	211.4	172.6	169.1	164.2	0.824478	0.036797	down	--	--	--	--
Bp07g0584.1	Cullin-3A GN=T2P11.2 OS=Arabidopsis thaliana (Mouse-ear cress) PE=1 SV=1	Bp07g0584	682.2	552.8	601.3	467.9	421.9	464.9	0.737733	0.0371459	down	Biological Process:ubiquitin-dependent protein catabolic process (GO:0006511),Molecular Function:ubiquitin protein ligase binding (GO:0031625)	cullin 3	--	--
Bp01g2355.1	Probable prolyl 4-hydroxylase 9 (Precursor) GN=P4H9 OS=Arabidopsis thaliana (Mouse-ear cress) PE=2 SV=1	Bp01g2355	133.5	130.9	122	108.5	102.2	104.5	0.815735	0.00884499	down	Molecular Function:iron ion binding (GO:0005506),Molecular Function:oxidoreductase activity (GO:0016491),Molecular Function:L-ascorbic acid binding (GO:0031418),Biological Process:oxidation-reduction process (GO:0055114)	prolyl 4-hydroxylase	Proline 4-hydroxylase (includes Rps23 Pro-64 3,4-dihydroxylase Tpa1), contains SM-20 domain	Translation, ribosomal structure and biogenesis ; Posttranslational modification, protein turnover, chaperones ;
Bp12g1478.1	COP9 signalosome complex subunit 2 GN=T20P8.4 OS=Arabidopsis thaliana (Mouse-ear cress) PE=1 SV=1	Bp12g1478	226.2	225.6	208.8	188.4	174.9	184	0.828489	0.00766258	down	Molecular Function:protein binding (GO:0005515)	COP9 signalosome complex subunit 2	--	--
Bp11g1721.1	CSC1-like protein At4g02900 GN=At4g02900 OS=Arabidopsis thaliana (Mouse-ear cress) PE=3 SV=1	Bp11g1721	87.3	103.9	95.6	80.5	63.8	67.6	0.738842	0.0231777	down	Cellular Component:membrane (GO:0016020)	calcium permeable stress-gated cation channel	--	--
Bp01g0289.1	3-hydroxyacyl-CoA dehydrogenase GN=AIM1 OS=Arabidopsis thaliana (Mouse-ear cress) PE=1 SV=1	Bp01g0289	87.3	93	94.9	59.8	62.2	58.8	0.656977	0.00162764	down	Molecular Function:catalytic activity (GO:0003824),Molecular Function:3-hydroxyacyl-CoA dehydrogenase activity (GO:0003857),Cellular Component:peroxisome (GO:0005777),Biological Process:fatty acid metabolic process (GO:0006631),Biological Process:fatty acid beta-oxidation (GO:0006635),Biological Process:metabolic process (GO:0008152),Molecular Function:oxidoreductase activity (GO:0016491),Biologi…	--	3-hydroxyacyl-CoA dehydrogenase	Lipid transport and metabolism ;
Bp09g0268.1	Probable NOT transcription complex subunit VIP2 (Fragment) GN=VIP2 OS=Nicotiana benthamiana PE=1 SV=1	Bp09g0268	212.6	221.4	193.6	260.6	310.7	271.1	1.34226	0.0246008	up	Cellular Component:nucleus (GO:0005634)	--	--	--
Bp01g1932.1	Serine/arginine-rich splicing factor RS31 GN=F21F14.30 OS=Arabidopsis thaliana (Mouse-ear cress) PE=1 SV=2	Bp01g1932	122	133.7	128.6	114.3	100.4	105.4	0.832943	0.0165702	down	Molecular Function:nucleic acid binding (GO:0003676)	--	--	--
Bp11g1136.1	-	Bp11g1136	83.4	75.4	89	101.7	99.9	100.4	1.21872	0.0423298	up	Molecular Function:catalytic activity (GO:0003824)	--	Pimeloyl-ACP methyl ester carboxylesterase	Coenzyme transport and metabolism ; General function prediction only ;
Bp07g0424.1	Equilibrative nucleotide transporter 1 GN=ENT1 OS=Arabidopsis thaliana (Mouse-ear cress) PE=1 SV=1	Bp07g0424	148.6	146.6	146.7	125.5	113.3	129.4	0.83322	0.0348204	down	Molecular Function:nucleoside transmembrane transporter activity (GO:0005337),Biological Process:transport (GO:0006810),Cellular Component:integral component of membrane (GO:0016021)	solute carrier family 29 (equilibrative nucleoside transporter), member 1/2/3	--	--
Bp01g0782.1	-	Bp01g0782	180.1	177.1	183.2	228.6	242	256.4	1.3453	0.0130756	up	--	--	Periplasmic protein TonB, links inner and outer membranes	Cell wall/membrane/envelope biogenesis ;
Bp02g2127.1	Protein indeterminate-domain 7 {ECO:0000303|PubMed:16784536} OS=Arabidopsis thaliana (Mouse-ear cress) PE=2 SV=1	Bp02g2127	107.4	107.9	95.7	132.1	121.8	135	1.25048	0.0100662	up	Molecular Function:metal ion binding (GO:0046872)	--	--	--
Bp03g1713.1	Uricase-2 GN=URIII OS=Phaseolus vulgaris (Kidney bean) PE=1 SV=2	Bp03g1713	151.7	157.5	142.2	116.2	100.1	122.5	0.750554	0.0130704	down	--	urate oxidase	Uricase (urate oxidase)	Secondary metabolites biosynthesis, transport and catabolism ;
Bp11g0732.1	Plastid division protein PDV2 GN=PDV2 OS=Arabidopsis thaliana (Mouse-ear cress) PE=1 SV=1	Bp11g0732	57.6	58.1	49.6	44.6	32.9	44.9	0.740472	0.0474643	down	--	--	--	--
Bp05g0202.1	Glycine-rich RNA-binding protein RZ1A {ECO:0000305} OS=Arabidopsis thaliana (Mouse-ear cress) PE=1 SV=1	Bp05g0202	284.4	278.5	241.2	315.1	347.5	351.9	1.26166	0.0177853	up	Molecular Function:nucleic acid binding (GO:0003676)	cleavage and polyadenylation specificity factor subunit 6/7	RNA recognition motif (RRM) domain	Translation, ribosomal structure and biogenesis ;
Bp05g1772.1	Thioredoxin-like protein Clot GN=At5g42850 OS=Arabidopsis thaliana (Mouse-ear cress) PE=2 SV=1	Bp05g1772	92.3	91.2	89.3	131.4	128.3	117.3	1.38196	0.0121716	up	--	--	--	--
Bp11g0410.1	Transcription factor RF2b GN=RF2b OS=Oryza sativa subsp. japonica (Rice) PE=1 SV=1	Bp11g0410	139.3	142.1	128.7	171.5	162.1	167.7	1.22238	0.00535732	up	Molecular Function:sequence-specific DNA binding (GO:0043565)	--	--	--
Bp07g1260.1	Sterol 14-demethylase GN=F25C20.17 OS=Arabidopsis thaliana (Mouse-ear cress) PE=1 SV=1	Bp07g1260	123.3	122.6	127.6	95.4	101.7	110.7	0.824096	0.0279609	down	Molecular Function:monooxygenase activity (GO:0004497),Molecular Function:iron ion binding (GO:0005506),Molecular Function:heme binding (GO:0020037),Biological Process:oxidation-reduction process (GO:0055114)	sterol 14-demethylase	Cytochrome P450	Secondary metabolites biosynthesis, transport and catabolism ; Defense mechanisms ;
Bp11g1951.1	Calvin cycle protein CP12-2, chloroplastic (Precursor) GN=CP12-2 OS=Arabidopsis thaliana (Mouse-ear cress) PE=1 SV=1	Bp11g1951	197.9	273.4	214	347.5	331.5	407.9	1.58602	0.0149103	up	--	--	CBS domain	Signal transduction mechanisms ;
Bp11g0707.1	Polyol transporter 5 GN=PLT5 OS=Arabidopsis thaliana (Mouse-ear cress) PE=1 SV=2	Bp11g0707	166	145.6	177.3	126.6	114.3	130.4	0.75946	0.0328736	down	Cellular Component:membrane (GO:0016020),Cellular Component:integral component of membrane (GO:0016021),Molecular Function:transmembrane transporter activity (GO:0022857),Molecular Function:substrate-specific transmembrane transporter activity (GO:0022891),Biological Process:transmembrane transport (GO:0055085)	--	Predicted arabinose efflux permease, MFS family	Carbohydrate transport and metabolism ;
Bp07g0722.1	Triose phosphate/phosphate translocator, chloroplastic (Precursor) GN=TPT OS=Flaveria trinervia (Clustered yellowtops) PE=2 SV=1	Bp07g0722	129.6	126.5	134.5	158.3	163.6	157.3	1.22683	0.000726353	up	--	solute carrier family 35, member E1	--	--
Bp01g3229.1	SufE-like protein, chloroplastic (Precursor) GN=M3E9.70 OS=Arabidopsis thaliana (Mouse-ear cress) PE=1 SV=2	Bp01g3229	201.7	184.4	177.4	267.5	259.2	226.2	1.33611	0.0199168	up	--	--	Acid stress-induced BolA-like protein IbaG/YrbA, predicted regulator of iron metabolism	Signal transduction mechanisms ;
Bp11g1448.1	Xyloglucan galactosyltransferase KATAMARI1 GN=F11A3.8 OS=Arabidopsis thaliana (Mouse-ear cress) PE=1 SV=1	Bp11g1448	139.3	135.7	140.8	119.4	99.9	112.2	0.797258	0.0316789	down	--	xyloglucan galactosyltransferase MUR3	--	--
Bp2040001.1	Acetyl-coenzyme A carboxylase carboxyl transferase subunit beta, chloroplastic {ECO:0000255|HAMAP-Rule:MF_01395} GN=MoinCp030 OS=Morus indica (Mulberry) PE=3 SV=1	Bp2040001	152.3	166.5	159.7	182.9	192.1	200.1	1.20188	0.00822479	up	--	acetyl-CoA carboxylase carboxyl transferase subunit beta	Acetyl-CoA carboxylase beta subunit	Lipid transport and metabolism ;
Bp08g0204.1	-	Bp08g0204	82.3	89.9	78.8	67.9	62.6	72	0.806773	0.0203671	down	Biological Process:fatty acid biosynthetic process (GO:0006633),Molecular Function:malonyl-CoA decarboxylase activity (GO:0050080)	malonyl-CoA decarboxylase	TRAP-type C4-dicarboxylate transport system, large permease component	Carbohydrate transport and metabolism ;
Bp07g0346.1	-	Bp07g0346	107.9	117.9	120.1	103.8	89.8	93.8	0.830876	0.0258239	down	--	--	Signal transduction histidine kinase	Signal transduction mechanisms ;
Bp10g0967.1	Xyloglucan endotransglucosylase/hydrolase protein 9 (Precursor) GN=F4C21.14 OS=Arabidopsis thaliana (Mouse-ear cress) PE=2 SV=2	Bp10g0967	34.8	36.9	41.9	30.3	27	27	0.742077	0.0258053	down	Cellular Component:cell wall (GO:0005618),Biological Process:carbohydrate metabolic process (GO:0005975),Biological Process:cellular glucan metabolic process (GO:0006073),Molecular Function:xyloglucan:xyloglucosyl transferase activity (GO:0016762),Cellular Component:apoplast (GO:0048046)	xyloglucan:xyloglucosyl transferase	Beta-glucanase, GH16 family	Carbohydrate transport and metabolism ;
Bp01g3169.1	Cinnamoyl-CoA reductase 1 GN=T24D18.5 OS=Arabidopsis thaliana (Mouse-ear cress) PE=1 SV=1	Bp01g3169	57.4	50.5	53.8	44.7	39	38.9	0.758194	0.00924649	down	Molecular Function:catalytic activity (GO:0003824),Molecular Function:coenzyme binding (GO:0050662)	--	Nucleoside-diphosphate-sugar epimerase	Cell wall/membrane/envelope biogenesis ;
Bp11g0765.1	B3 domain-containing transcription factor VRN1 GN=VRN1 OS=Arabidopsis thaliana (Mouse-ear cress) PE=1 SV=1	Bp11g0765	63.6	58.8	56.9	77.5	81.1	73	1.29169	0.00515958	up	Molecular Function:DNA binding (GO:0003677)	--	--	--
Bp06g2032.1	-	Bp06g2032	36.6	39.3	37.1	30.5	29.4	30.9	0.80354	0.00392977	down	--	--	5-methylcytosine-specific restriction endonuclease McrA	Defense mechanisms ;
Bp03g0381.1	DeSI-like protein At4g17486 GN=At4g17486 OS=Arabidopsis thaliana (Mouse-ear cress) PE=2 SV=1	Bp03g0381	28.7	21.8	23.7	32.7	32.8	34.9	1.3531	0.0394368	up	--	--	--	--
Bp12g1195.1	Cytochrome P450 CYP736A12 OS=Panax ginseng (Korean ginseng) PE=2 SV=1	Bp12g1195	40.5	44.3	45.2	35.2	35.5	36.1	0.821538	0.0295561	down	Molecular Function:iron ion binding (GO:0005506),Molecular Function:heme binding (GO:0020037),Biological Process:oxidation-reduction process (GO:0055114)	--	Cytochrome P450	Secondary metabolites biosynthesis, transport and catabolism ; Defense mechanisms ;
Bp02g1787.1	Nucleobase-ascorbate transporter 3 GN=NAT3 OS=Arabidopsis thaliana (Mouse-ear cress) PE=2 SV=2	Bp02g1787	212.4	165.7	188.4	108.7	90.8	101.8	0.531862	0.0133517	down	Molecular Function:transporter activity (GO:0005215),Biological Process:transport (GO:0006810),Cellular Component:membrane (GO:0016020),Biological Process:transmembrane transport (GO:0055085)	--	Xanthine/uracil permease	Nucleotide transport and metabolism ;
Bp04g1314.1	Digalactosyldiacylglycerol synthase 1, chloroplastic (Precursor) GN=DGD1 OS=Lotus japonicus (Lotus corniculatus var. japonicus) PE=2 SV=1	Bp04g1314	50	46.1	43.4	41.2	30.3	32.3	0.744086	0.0499402	down	--	digalactosyldiacylglycerol synthase	Glycosyltransferase involved in cell wall bisynthesis	Cell wall/membrane/envelope biogenesis ;
Bp10g1691.1	Pentatricopeptide repeat-containing protein At3g46610 GN=At3g46610 OS=Arabidopsis thaliana (Mouse-ear cress) PE=2 SV=1	Bp10g1691	69.8	66.7	72.4	54.7	48.5	61.9	0.79033	0.0474328	down	--	--	--	--
Bp02g1322.1	Protein MITOFERRINLIKE 1, chloroplastic (Precursor) GN=MFL1 OS=Arabidopsis thaliana (Mouse-ear cress) PE=2 SV=1	Bp02g1322	190.7	149.2	175.1	133.8	105.9	123.5	0.705243	0.0316532	down	--	solute carrier family 25 (mitochondrial S-adenosylmethionine transporter), member 26	--	--
Bp2880001.1	Endochitinase 1 (Precursor Fragment) GN=CHTB1 OS=Solanum tuberosum (Potato) PE=2 SV=1	Bp2880001	137.1	123.7	109.3	90.5	101.2	84.8	0.747095	0.0392014	down	Molecular Function:chitinase activity (GO:0004568),Biological Process:chitin catabolic process (GO:0006032),Molecular Function:chitin binding (GO:0008061),Biological Process:cell wall macromolecule catabolic process (GO:0016998)	--	Chitodextrinase	Carbohydrate transport and metabolism ;
Bp06g1459.1	Uncharacterized protein At4g19900 GN=At4g19900 OS=Arabidopsis thaliana (Mouse-ear cress) PE=2 SV=1	Bp06g1459	69.5	63.5	71.8	41.7	47.9	52.2	0.692383	0.00661187	down	--	lactosylceramide 4-alpha-galactosyltransferase	Mannosyltransferase OCH1 or related enzyme	Cell wall/membrane/envelope biogenesis ;
Bp02g1287.1	UDP-glycosyltransferase 91C1 GN=UGT91C1 OS=Arabidopsis thaliana (Mouse-ear cress) PE=2 SV=1	Bp02g1287	70	64.9	61.9	55	45.6	57	0.800813	0.0438917	down	Biological Process:metabolic process (GO:0008152)	--	UDP:flavonoid glycosyltransferase YjiC, YdhE family	Carbohydrate transport and metabolism ;
Bp0690006.1	11-beta-hydroxysteroid dehydrogenase-like 3 GN=HSD3 OS=Arabidopsis thaliana (Mouse-ear cress) PE=3 SV=1	Bp0690006	212.3	207.8	187	165.8	154.3	169.8	0.806951	0.0194094	down	--	--	NADP-dependent 3-hydroxy acid dehydrogenase YdfG	Energy production and conversion ;
Bp11g1550.1	Protein root UVB sensitive 2, chloroplastic {ECO:0000303|PubMed:19515790} OS=Arabidopsis thaliana (Mouse-ear cress) PE=1 SV=2	Bp11g1550	16.7	17	16.8	21.3	19.5	21	1.22376	0.0190875	up	--	--	--	--
Bp09g1487.1	Alpha carbonic anhydrase 7 (Precursor) GN=ACA7 OS=Arabidopsis thaliana (Mouse-ear cress) PE=2 SV=1	Bp09g1487	100.7	84.5	105.8	70.8	64.6	70.2	0.706529	0.0377289	down	--	carbonic anhydrase	Carbonic anhydrase	Inorganic ion transport and metabolism ;
Bp01g2841.1	Probable ribosome biogenesis protein RLP24 GN=At2g44860 OS=Arabidopsis thaliana (Mouse-ear cress) PE=2 SV=1	Bp01g2841	117.1	127	104.2	165.5	169.7	140.6	1.36606	0.0228109	up	--	large subunit ribosomal protein L24e	Ribosomal protein L24E	Translation, ribosomal structure and biogenesis ;
Bp09g0168.1	Type II inositol 1,4,5-trisphosphate 5-phosphatase FRA3 GN=FRA3 OS=Arabidopsis thaliana (Mouse-ear cress) PE=1 SV=2	Bp09g0168	35.4	36.9	37.9	32.7	27.9	30.2	0.823956	0.0253549	down	Biological Process:phosphatidylinositol dephosphorylation (GO:0046856)	--	--	--
Bp01g2719.1	Mannan endo-1,4-beta-mannosidase 7 (Precursor) GN=MAN7 OS=Arabidopsis thaliana (Mouse-ear cress) PE=2 SV=1	Bp01g2719	303.5	315.3	312.5	266.5	220.1	257	0.798454	0.0406052	down	Biological Process:carbohydrate metabolic process (GO:0005975)	mannan endo-1,4-beta-mannosidase	Endo-1,4-beta-mannosidase	Carbohydrate transport and metabolism ;
Bp13g0917.1	-	Bp13g0917	120	113.7	112.4	65.3	59.2	64.9	0.547241	8.54e-05	down	--	--	--	--
Bp11g0531.1	Squalene synthase OS=Nicotiana benthamiana PE=2 SV=1	Bp11g0531	180.1	171.9	162.3	149.2	143.1	133.6	0.828116	0.0131202	down	Biological Process:biosynthetic process (GO:0009058),Molecular Function:transferase activity (GO:0016740)	farnesyl-diphosphate farnesyltransferase	Phytoene/squalene synthetase	Lipid transport and metabolism ;
Bp05g1418.1	-	Bp05g1418	91	100.7	89.2	119.9	116.3	102.6	1.20612	0.0457685	up	--	--	--	--
Bp01g2295.1	Telomere repeat-binding factor 2 GN=K9I9.15 OS=Arabidopsis thaliana (Mouse-ear cress) PE=1 SV=1	Bp01g2295	53	45.7	52.9	45.6	37.1	39.9	0.808707	0.0499103	down	Cellular Component:nucleosome (GO:0000786),Molecular Function:DNA binding (GO:0003677),Cellular Component:nucleus (GO:0005634),Biological Process:nucleosome assembly (GO:0006334)	--	--	--
Bp04g1864.1	Protein ALUMINUM SENSITIVE 3 GN=F3G5.12 OS=Arabidopsis thaliana (Mouse-ear cress) PE=1 SV=1	Bp04g1864	55.5	59.9	53	44.7	42.4	46.5	0.793349	0.0131407	down	--	putative ABC transport system permease protein	ABC-type iron transport system FetAB, permease component	Inorganic ion transport and metabolism ;
Bp10g0602.1	Aspartate aminotransferase, mitochondrial (Precursor) GN=ASP1 OS=Arabidopsis thaliana (Mouse-ear cress) PE=1 SV=1	Bp10g0602	45.7	46.7	49.3	39.8	38.1	35.8	0.802399	0.00418187	down	Biological Process:cellular amino acid metabolic process (GO:0006520),Molecular Function:transaminase activity (GO:0008483),Biological Process:biosynthetic process (GO:0009058),Molecular Function:pyridoxal phosphate binding (GO:0030170)	aspartate aminotransferase, mitochondrial	Aspartate/tyrosine/aromatic aminotransferase	Amino acid transport and metabolism ;
Bp06g0411.1	Hydroquinone glucosyltransferase GN=AS OS=Rauvolfia serpentina (Serpentine wood) PE=1 SV=1	Bp06g0411	42.4	38.7	44.8	35	31.2	34.8	0.802224	0.0227841	down	Biological Process:metabolic process (GO:0008152)	hydroquinone glucosyltransferase	UDP:flavonoid glycosyltransferase YjiC, YdhE family	Carbohydrate transport and metabolism ;
Bp0110015.1	Serine/threonine-protein kinase TIO GN=F14I3.15 OS=Arabidopsis thaliana (Mouse-ear cress) PE=1 SV=1	Bp0110015	57.4	48.2	64.3	37.5	37.2	43.4	0.695115	0.0491549	down	Molecular Function:protein kinase activity (GO:0004672),Molecular Function:protein binding (GO:0005515),Molecular Function:ATP binding (GO:0005524),Biological Process:protein phosphorylation (GO:0006468)	fused	Serine/threonine protein kinase	Signal transduction mechanisms ;
Bp10g1209.1	ABC transporter B family member 25 GN=OSJNBb0081K01.19 OS=Oryza sativa subsp. japonica (Rice) PE=2 SV=1	Bp10g1209	233.3	219.1	241.3	183.7	182.3	206.8	0.825717	0.0184513	down	Molecular Function:ATP binding (GO:0005524),Biological Process:transport (GO:0006810),Cellular Component:integral component of membrane (GO:0016021),Molecular Function:ATPase activity (GO:0016887),Biological Process:transmembrane transport (GO:0055085)	--	ABC-type multidrug transport system, ATPase and permease component	Defense mechanisms ;
Bp01g0307.1	NADPH:adrenodoxin oxidoreductase, mitochondrial (Precursor) OS=Arabidopsis thaliana (Mouse-ear cress) PE=1 SV=1	Bp01g0307	32.5	35.9	33.2	22	25.4	23.7	0.699803	0.00207777	down	Molecular Function:oxidoreductase activity (GO:0016491),Biological Process:oxidation-reduction process (GO:0055114)	adrenodoxin-NADP+ reductase	NADPH-dependent glutamate synthase beta chain or related oxidoreductase	Amino acid transport and metabolism ; General function prediction only ;
Bp01g1232.1	-	Bp01g1232	69.3	67.3	74.5	55.6	58.4	58.6	0.817622	0.0147122	down	Molecular Function:protein binding (GO:0005515),Molecular Function:zinc ion binding (GO:0008270)		--	--
Bp02g2084.1	PITH domain-containing protein At3g04780 GN=At3g04780 OS=Arabidopsis thaliana (Mouse-ear cress) PE=1 SV=2	Bp02g2084	179.1	192.6	180.9	252.6	246.3	222.7	1.30583	0.0130874	up	--	--	--	--
Bp04g1146.1	OTU domain-containing protein At3g57810 GN=At3g57810 OS=Arabidopsis thaliana (Mouse-ear cress) PE=2 SV=1	Bp04g1146	83.4	75.9	72	109.6	118.6	97.1	1.4064	0.0204627	up	Molecular Function:ATP binding (GO:0005524),Biological Process:biosynthetic process (GO:0009058)	--	UDP-N-acetylmuramoylalanine-D-glutamate ligase	Cell wall/membrane/envelope biogenesis ;
Bp04g1935.1	Replication factor C subunit 3 GN=At5g27740 OS=Arabidopsis thaliana (Mouse-ear cress) PE=2 SV=1	Bp04g1935	134.9	135.2	131.3	174.7	160.6	155.5	1.22272	0.0303796	up	--	replication factor C subunit 3/5	DNA polymerase III, delta prime subunit	Replication, recombination and repair ;
Bp10g1128.1	Cyclin-B1-2 GN=CYCB1-2 OS=Oryza sativa subsp. japonica (Rice) PE=3 SV=1	Bp10g1128	115.8	103.6	118.6	100.8	85.1	90	0.816272	0.0339467	down	Biological Process:cellular metabolic process (GO:0044237)	translation initiation factor eIF-2B subunit delta	Translation initiation factor 2B subunit, eIF-2B alpha/beta/delta family	Translation, ribosomal structure and biogenesis ;
Bp05g0696.1	tRNA (guanine(37)-N1)-methyltransferase 1 {ECO:0000255|HAMAP-Rule:MF_03152} GN=VIT_19s0014g03930 OS=Vitis vinifera (Grape) PE=3 SV=1	Bp05g0696	91.7	79.3	93.8	76.5	70.6	62.1	0.79003	0.039905	down	--	tRNA (guanine37-N1)-methyltransferase	tRNA G37 N-methylase Trm5	Translation, ribosomal structure and biogenesis ;
Bp05g0321.1	Zinc finger CCCH domain-containing protein 19 GN=F16F14 OS=Arabidopsis thaliana (Mouse-ear cress) PE=1 SV=3	Bp05g0321	59.8	61.9	54.1	52.1	44.6	41.4	0.785552	0.0373459	down	Molecular Function:protein binding (GO:0005515)	upstream activation factor subunit UAF30	Chromatin remodeling complex protein RSC6, contains SWIB domain	Chromatin structure and dynamics ;
Bp05g1144.1	Pyridoxal kinase GN=K18L3_10 OS=Arabidopsis thaliana (Mouse-ear cress) PE=1 SV=2	Bp05g1144	56.7	59.8	57.3	44.7	43.7	48.6	0.788262	0.00411633	down	Molecular Function:pyridoxal kinase activity (GO:0008478),Biological Process:pyridoxal 5'-phosphate salvage (GO:0009443)	pyridoxine kinase	Pyridoxal/pyridoxine/pyridoxamine kinase	Coenzyme transport and metabolism ;
Bp05g1108.1	Protein ENHANCED DISEASE RESISTANCE 2-like GN=EDR2L OS=Arabidopsis thaliana (Mouse-ear cress) PE=2 SV=1	Bp05g1108	153.6	151	139.9	118.6	114.1	136.4	0.830371	0.0447546	down	--	--	--	--
Bp07g1610.1	-	Bp07g1610	100.5	100.7	91.7	138.1	151.8	122.3	1.40731	0.0319173	up	--	protein FAM32A	--	--
Bp13g0024.1	-	Bp13g0024	83.2	80.2	69.8	67.9	60.9	61	0.813894	0.0495689	down	Molecular Function:protein binding (GO:0005515)	--	--	--
Bp09g1863.1	Zinc finger CCCH domain-containing protein ZFN-like OS=Pisum sativum (Garden pea) PE=2 SV=1	Bp09g1863	56.7	56.7	48.7	38.6	40.5	48.2	0.785318	0.0435015	down	Molecular Function:metal ion binding (GO:0046872)	--	--	--
Bp02g1292.1	-	Bp02g1292	92.6	101.5	78.9	113.4	131.3	111	1.30293	0.0398239	up	--	U3 small nucleolar ribonucleoprotein protein LCP5	--	--
Bp05g1851.1	-	Bp05g1851	34.4	28.4	33.9	21.9	21.2	20.8	0.660807	0.026809	down	--	--	--	--
Bp01g0193.1	Sodium/pyruvate cotransporter BASS2, chloroplastic (Precursor) GN=F12C20.6 OS=Arabidopsis thaliana (Mouse-ear cress) PE=2 SV=1	Bp01g0193	171.6	144.9	177.3	211.4	209.7	198.5	1.25476	0.0377512	up	Cellular Component:membrane (GO:0016020)	bile acid:Na+ symporter, BASS family	Predicted Na+-dependent transporter	General function prediction only ;
Bp13g0179.1	Mediator-associated protein 1 GN=At4g25210 OS=Arabidopsis thaliana (Mouse-ear cress) PE=1 SV=1	Bp13g0179	59.9	52.3	43.3	90	91.1	65.6	1.5865	0.0464478	up	--	--	--	--
Bp11g1264.1	Protein FAR1-RELATED SEQUENCE 5 GN=FRS5 OS=Arabidopsis thaliana (Mouse-ear cress) PE=2 SV=1	Bp11g1264	180.1	157.6	186.2	108.5	100	104.1	0.596679	0.0103786	down	--	--	--	--
Bp10g1197.1	FHA domain-containing protein DDL GN=DDL OS=Arabidopsis thaliana (Mouse-ear cress) PE=1 SV=1	Bp10g1197	100.5	81.7	100.1	77.2	67.8	69	0.758059	0.048423	down	Molecular Function:protein binding (GO:0005515)	--	Forkhead associated (FHA) domain, binds pSer, pThr, pTyr	Signal transduction mechanisms ;
Bp03g0454.1	-	Bp03g0454	133.6	127.7	118.8	166.3	173	154.5	1.29913	0.00620424	up	Molecular Function:protein phosphatase inhibitor activity (GO:0004864),Biological Process:regulation of signal transduction (GO:0009966),Biological Process:regulation of phosphoprotein phosphatase activity (GO:0043666)	protein phosphatase inhibitor 2	--	--
Bp12g0319.1	Peptidyl-prolyl cis-trans isomerase FKBP42 GN=MIL23.21 OS=Arabidopsis thaliana (Mouse-ear cress) PE=1 SV=1	Bp12g0319	91.8	100.9	89	75.8	61.5	64.4	0.71601	0.0100345	down	Molecular Function:protein binding (GO:0005515)	--	FKBP-type peptidyl-prolyl cis-trans isomerase	Posttranslational modification, protein turnover, chaperones ;
Bp07g0122.1	-	Bp07g0122	112.7	107.2	85.3	144.2	166.2	129.5	1.44135	0.0321246	up	Cellular Component:endoplasmic reticulum (GO:0005783)	--	--	--
Bp04g1270.1	Dirigent protein 21 (Precursor) GN=DIR21 OS=Arabidopsis thaliana (Mouse-ear cress) PE=3 SV=1	Bp04g1270	61.8	54.9	57.4	50.9	47.3	45.3	0.824239	0.0185756	down	--	--	--	--
