# Supplementary material for: iTRAQ-Based Quantitative Proteomics Analysis Reveals the Mechanism of Golden-Yellow Leaf Mutant in Hybrid Paper Mulberry
Source: Int J Mol Sci. 2021 Dec 23;23(1):127. doi: 10.3390/ijms23010127 (PMC8745438; doi:10.3390/ijms23010127)
Supplement: Supplementary file 1 [file ijms-23-00127-s001.zip › Table S2.xlsx]

## Sheet: Sheet1
Table S2 Primer sequences for gene expression analysis by qRT-PCR
Genes	Forward Primer (5’ - 3’)	Reverse Primer (5’- 3’)
CHLH	GGTGCAGGAATGACCGAGAA	CTCACCGTCTCAGCAAGTGT
UROD	CGTTGCAGCCTTGGAATGTT	GCACTGCTGCCTGGTTATCT
ZEP	CCACATCCAGGAAGAGTCGG	CATCTGCGTAGCTGGTCACT
CCR	CATAATCCACGCCACCGTCT	GTAGGACGTTGAGAGTGCCG
PsaA	GGACATGCCAAGTATCCGCT	TTCTTGCCAATAACCACGCC
PsaB	GTGAAGCATATGGTTGCCCG	AAGAACATCCACGCCCAGAC
PsbA	CCCTACCTTATTGACCGCAACT	CATTCATCAACGGAAGCCGC
PsbB	CTATGTGGTATGGCTCGGCA	TGTCCATTGATCCCGCTCTG
LHCA2	CCGCTAGTTCGTTCCTTGGT	GCACAATCTCGGATTGCACA
LHCB4.2	GACCAGAACCTGGCGAAGAA	TTCCACTAGCTCCACCTTGC
GAPDH	GACCTCACCGTAAGGCTGGA	CCACTCGTTGTCGTACCACG
